# Supplementary material for: Development of Dibenzothiazepine Derivatives as Multifunctional Compounds for Neuropathic Pain
Source: MDPI journal article supplement (doi:10.3390/ph15040407), 2022-03-27
Supplement: s1 [file s1]

# Development of Dibenzothiazepine Derivatives as Multifunctional Compounds for Neuropathic Pain

Young-Hwan Jung <sup>1,†</sup>, Yeo Ok Kim <sup>2,†</sup>, Koon Mook Kang <sup>1,†</sup>, Hyung Gon Lee <sup>2,3</sup>, Borum Son <sup>1</sup>, Xuehao Han <sup>2,3</sup>, Eunseok Oh <sup>4</sup>, Siwon Kim <sup>5</sup>, Seon Hee Seo <sup>5</sup>, Jong-Hyun Park <sup>5,6</sup>, Ki Duk Park <sup>5,6</sup>, Woong Mo Kim <sup>2,3</sup>, Myung Ha Yoon <sup>2,\*</sup> and Yong-Chul Kim <sup>1,7,\*</sup>

- <sup>1</sup> School of Life Sciences at Gwangju Institute of Science and Technology (GIST), Gwangju 61005, Korea; young-hwan.jung@nih.gov (Y.-H.J.); km1944@gm.gist.ac.kr (K.M.K.); br219@hanmail.net (B.S.)
  - <sup>2</sup> Department of Anesthesiology and Pain Medicine, Chonnam National University Medical School, Gwangju 61469, Korea; yeok1017@hanmail.net (Y.O.K.); leehg@chonnam.ac.kr (H.G.L.); 752253335h@gmail.com (X.H.); kimwm@chonnam.ac.kr (W.M.K.)
  - <sup>3</sup> Center for Creative Biomedical Scientists, Chonnam National University Medical School, Gwangju 61469, Korea
  - <sup>4</sup> Department of Chemistry, Gwangju Institute of Science and Technology (GIST), Gwangju 61005, Korea; dmstjr0130@snu.ac.kr
  - <sup>5</sup> Convergence Research Center for Brain Science, Korea Institute of Science and Technology (KIST), Seoul 02792, Korea; h15512@kist.re.kr (S.K.); shseo@kist.re.kr (S.H.S.); jhyunprk@kist.re.kr (J.-H.P.); kdpark@kist.re.kr (K.D.P.)
  - <sup>6</sup> Division of Bio-Medical Science & Technology, KIST School, Korea University of Science and Technology, Seoul 02792, Korea
  - <sup>7</sup> Department of Biomedical Science and Engineering, Gwangju Institute of Science and Technology (GIST), Gwangju 61005, Korea
- \* Correspondence: mhyoon@chonnam.ac.kr (M.H.Y.); yongchul@gist.ac.kr (Y.-C.K.)  
† These authors contributed equally to this work.

| <u>Contents</u>                                    | <u>Pages</u> |
|----------------------------------------------------|--------------|
| Synthetic Scheme S1                                | S2           |
| Chemical synthesis (18-22)                         | S3-S4        |
| Experimental details for biology                   | S5           |
| In vitro metabolic stability of selected compounds | S6           |
| HPLC purity of antiallodynic agents (12, 17)       | S7-S8        |

**Scheme S1.** Synthesis of compounds **21** and **22**.

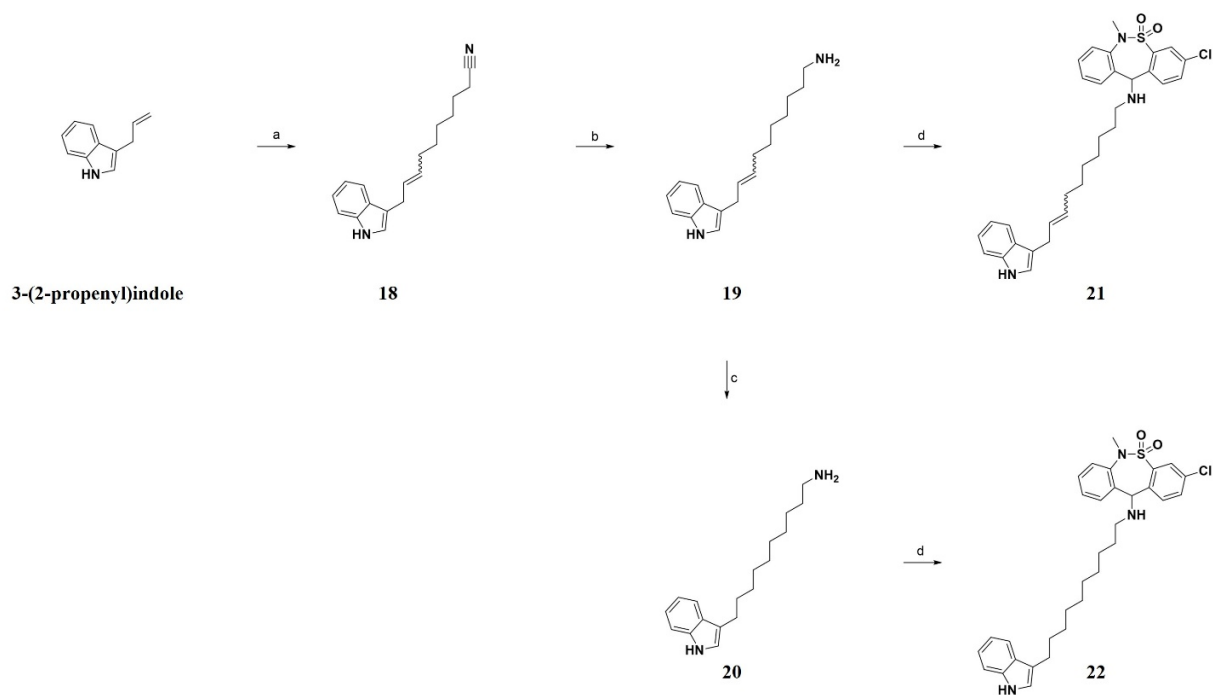

**Reagents and conditions.** (a) 8-nonenitrile, Grubbs catalyst (1<sup>st</sup> generation), DCM, 50 °C, 12 h, 69-75%; (b) LiAlH<sub>4</sub>, THF, 0 °C, 3.5 h, 48-62%; (c) Pd/C, H<sub>2</sub> gas, MeOH, RT, 0.5 h, 76-85%; (d) 3,11-dichloro-6-methyl-6,11-dihydrodibenzo[*c,f*][1,2]thiazepine 5,5-dioxide, TEA, DCM, RT, 18 h, 65-78%.

## Chemical synthesis

### 10-(1H-indol-3-yl)dec-8-enenitrile (**18**).

To a mixture of 8-nonenenitrile (1.22 g, 8.91 mmol) and 3-(2-propenyl)indole (0.70 g, 4.45 mmol) in anhydrous dichloromethane, a solution of Grubbs catalyst, 1<sup>st</sup> generation (0.73 g, 0.89 mmol) in dry dichloromethane was added. After the reaction mixture was stirred for 12 h at 50 °C under an atmosphere of Ar, it was cooled to room temperature. The reaction mixture was diluted with saturated aq. NH<sub>4</sub>Cl and extracted with dichloromethane. The combined organic extracts were dried with anhydrous Na<sub>2</sub>SO<sub>4</sub>, and the mixture was filtered through celite. The filtered mixture was evaporated and purified by silica gel column chromatography in *n*-hexanes/ethyl acetate = 7:1 to afford **18**. Yield 0.85 g (71.8%); <sup>1</sup>H NMR (CDCl<sub>3</sub>, 400 MHz) δ (ppm); 7.57 (d, *J* = 8.0 Hz, 1H), 7.33 (d, *J* = 8.0 Hz, 1H), 7.15-7.20 (m, 1H), 7.05-7.13 (m, 1H), 6.92-7.00 (m, 1H), 5.45-5.75 (m, 2H), 3.50 (m, 2H), 2.25-2.35 (m, 2H), 1.95-2.05 (m, 2H), 1.55-1.70 (m, 2H), 1.25-1.36 (m, 6H); MS (ESI): [M+H] = 267.1.

### 10-(1H-indol-3-yl)dec-8-en-1-amine (**19**).

To a solution of **18** (0.20 g, 0.75 mmol) in tetrahydrofuran at 0 °C, a suspension of 1M LiAlH<sub>4</sub> in tetrahydrofuran (2.25 mL, 2.25 mmol) was added dropwise over a period of 0.5 h. After the addition was complete, the reaction mixture was stirred at 0 °C under N<sub>2</sub> atmosphere for 3 h. The reaction mixture was quenched with saturated aqueous NH<sub>4</sub>Cl, and then the mixture was filtered through celite. The filtered mixture was evaporated and purified by silica gel column chromatography in chloroform/methanol = 10:1 to afford **19**. Yield 0.16 g (52.2%); <sup>1</sup>H NMR (CD<sub>3</sub>OD, 400 MHz) δ (ppm); 7.43-7.48 (m, 1H), 7.25-7.33 (m, 1H), 7.00-7.07 (m, 1H), 6.90-6.97 (m, 2H), 5.45-5.70 (m, 2H), 3.35-3.50 (m, 2H), 2.81-2.87 (m, 2H), 1.97-2.05 (m, 2H), 1.55-1.65 (m, 2H), 1.26-1.42 (m, 8H); MS (ESI): [M+H] = 271.1.

### 10-(1H-indol-3-yl)decan-1-amine (**20**).

To a solution of **19** (25.0 mg, 0.092 mmol) in methanol was added 10% Pd/C (5.0 mg). The reaction mixture was stirred for 0.5 h under H<sub>2</sub> atmosphere. After completion of reaction, the mixture was filtered through celite pad. The filtrate was evaporated and purified by silica gel column chromatography in chloroform/methanol = 20:1 to afford **20**. Yield 20 mg (79.4%); <sup>1</sup>H NMR (CD<sub>3</sub>OD, 400 MHz) δ (ppm); 7.44-7.48 (m, 1H), 7.26-7.29 (m, 1H), 7.00-7.07 (m, 1H), 6.90-

6.97 (m, 2H), 2.81-2.87 (m, 2H), 2.67-2.73 (m, 2H), 1.55-1.73 (m, 4H), 1.24-1.42 (m, 12H); MS (ESI): [M+H] = 273.1.

11-((10-(1H-indol-3-yl)dec-8-en-1-yl)amino)-3-chloro-6-methyl-6,11-dihydrodibenzo[c,f][1,2]thiazepine 5,5-dioxide (**21**).

Following the general procedure A, **21** was synthesized from **19** (20.0 mg, 0.073 mmol). Yield 32.1 mg (77.2%); <sup>1</sup>H NMR (CDCl<sub>3</sub>, 400 MHz) δ (ppm); 7.93-7.96 (m, 1H), 7.41-7.51 (m, 3H), 7.29-7.40 (m, 4H), 7.14-7.22 (m, 2H), 7.04-7.09 (m, 1H), 6.97-7.02 (m, 1H), 5.35-5.55 (m, 2H), 4.96 (s, 1H), 3.33 (s, 3H), 2.91-2.94 (m, 2H), 2.40-2.45 (m, 2H), 1.82-1.97 (m, 2H), 1.35-1.50 (m, 2H), 1.15-1.30 (m, 8H); MS (ESI): [M+H] = 562.9; HRMS (ESI) [M+H]<sup>+</sup> (C<sub>32</sub>H<sub>36</sub>ClN<sub>3</sub>O<sub>2</sub>S): calcd. 562.2290, found. 562.2251.

11-((10-(1H-indol-3-yl)decyl)amino)-3-chloro-6-methyl-6,11-dihydrodibenzo[c,f][1,2]thiazepine 5,5-dioxide (**22**).

Following the general procedure A, **22** was synthesized from **20** (6.0 mg, 0.022 mmol). Yield 8.2 mg (66.1%); <sup>1</sup>H NMR (CDCl<sub>3</sub>, 400 MHz) δ (ppm); 7.94 (d, *J* = 2.0 Hz, 1H), 7.40-7.50 (m, 3H), 7.31-7.40 (m, 4H), 7.26-7.30 (m, 1H), 7.16-7.19 (m, 1H), 6.97-7.10 (m, 2H), 4.98 (s, 1H), 3.35 (s, 3H), 2.62-2.72 (m, 2H), 2.42-2.48 (m, 2H), 1.43-1.53 (m, 4H), 1.17-1.32 (m, 12H); MS (ESI): [M+H] = 564.9; HRMS (ESI) [M+H]<sup>+</sup> (C<sub>32</sub>H<sub>38</sub>ClN<sub>3</sub>O<sub>2</sub>S): calcd. 564.2394, found. 564.2398.

### Experimental details for Biology

**Cell culture.** HEK293 cells stably expressing human DA transporter (HEK-hDAT), human NE transporter (HEK-hNET) and human serotonin transporter (HEK-hSERT) were kindly provided by Professor Bryan Roth (University of North Carolina at Chapel Hill). And HEK293 cells constitutively expressing human  $\kappa$ - or  $\mu$ - opioid receptor (HEK-hKOR\_NM000912 or HEK-hMOR\_NM000914) were constructed by Professor Ki Duk Park (in Korea Institute of Science and Technology). And CHO-K1 OPRM1  $\beta$ -Arrestin cell line (#93-0213) was purchased from Europins DiscoverX (Fremont, CA, USA). Cells were maintained in Dulbecco's modified Eagle's medium (HyClone, Logan, UT, USA) supplemented with 10%(v/v) fetal bovine serum (FBS, HyClone, Logan, UT, USA), penicillin (100 U/mL), and streptomycin (100  $\mu$ g/mL) in the presence of Geneticin G418 (350  $\mu$ g/mL, 200  $\mu$ g/mL, 500  $\mu$ g/mL, 1000  $\mu$ g/mL and 1000  $\mu$ g/mL for HEK-hDAT, HEK-hNET, HEK-hSERT, HEK-hKOR and HEK-hMOR respectively) in a humidified 5% CO<sub>2</sub> incubator at 37 °C. In case of both HEK-hKOR and HEK-hMOR, cells were additionally maintained in 0.2 mg/mL hygromycin B, 1  $\mu$ g/mL puromycin B, 1 $\times$  non-essential amino acids. The cells were subcultured every 3-4 days.

**Microsomal stability.** The metabolic stability of compounds was evaluated in rat liver microsomes (RLM). Microsomes (0.5 mg/ml) and test compound (1  $\mu$ M) in 100 mM potassium phosphate buffer (pH 7.4) were preincubated with shaking (100 rpm) for 5 min at 37 °C. The metabolic reaction was initiated by the addition of an NADPH generating system (60 mM potassium phosphate buffer pH 7.4, 1.3 mM NADP, 3.3 mM glucose-6-phosphate, 0.3  $\mu$ L glucose-6-phosphate dehydrogenase (0.4 U/mL), and 3.3 mM magnesium chloride) and incubated at 37 °C. Aliquots of 100  $\mu$ L were withdrawn at 0, 10, 20, 30 and 60 min, and 2 volumes of ice-cold acetonitrile (ACN) were added to terminate the reaction. After mixing by vortex and centrifugation (14000 rpm) for 15 min at 4 °C, the supernatant was transferred to liquid chromatography vials and analyzed by an LC-MS/MS system.

**Table S1.** In vitro metabolic stability of selected compounds.

| Compounds | Recovery (%) <sup>a</sup> |     |       |
|-----------|---------------------------|-----|-------|
|           | Human                     | Rat | Mouse |
| 12        | 5%                        | 6%  | 5%    |
| 17        | 0%                        | 1%  | 1%    |

<sup>a</sup>% remaining after 30 min incubation with S9 microsomal fraction.

**Figure S1.** HPLC purity of **12** (98%,  $R_t$  = 19.56 min) as an antiallodynic agent.

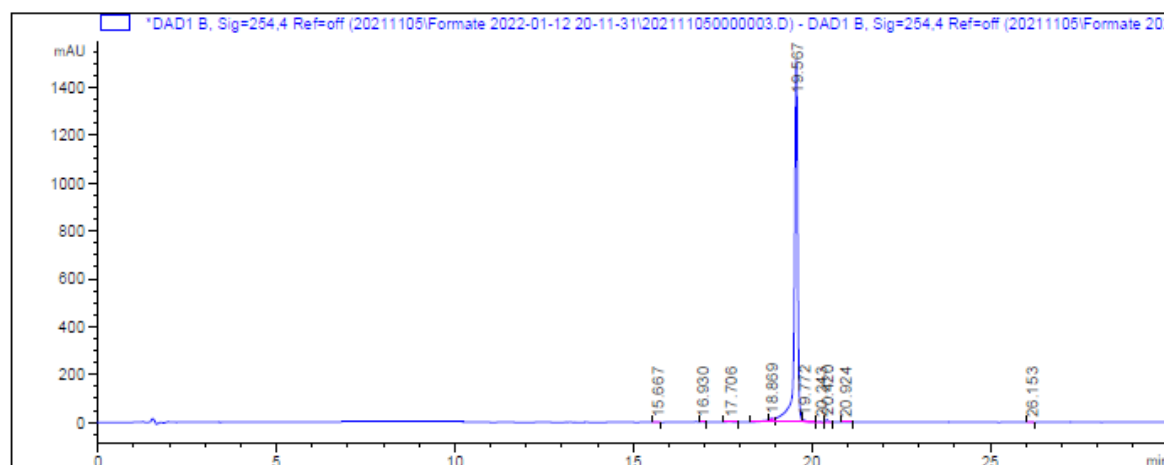

# Area Percent Report

Sorted By : Signal  
Multiplier : 1.0000  
Dilution : 1.0000  
Do not use Multiplier & Dilution Factor with ISTDs

Signal 1: DAD1 B, Sig=254,4 Ref=off  
Signal has been modified after loading from rawdata file!

| Peak # | RetTime [min] | Type | Width [min] | Area [mAU*s] | Height [mAU] | Area %  |
|--------|---------------|------|-------------|--------------|--------------|---------|
| 1      | 15.667        | BB   | 0.1024      | 10.10456     | 1.54305      | 0.0978  |
| 2      | 16.930        | BB   | 0.0660      | 8.36063      | 1.95054      | 0.0809  |
| 3      | 17.706        | BB   | 0.1852      | 15.36503     | 1.17018      | 0.1488  |
| 4      | 18.869        | VV E | 0.0725      | 24.37649     | 5.22166      | 0.2360  |
| 5      | 19.567        | VV R | 0.1003      | 1.01530e4    | 1513.31213   | 98.2919 |
| 6      | 19.772        | VB E | 0.0830      | 38.66914     | 6.73508      | 0.3744  |
| 7      | 20.243        | BB   | 0.0874      | 13.02500     | 2.32399      | 0.1261  |
| 8      | 20.420        | BB   | 0.0801      | 55.06189     | 10.69470     | 0.5331  |
| 9      | 20.924        | BB   | 0.0802      | 5.35812      | 1.03926      | 0.0519  |
| 10     | 26.153        | BB   | 0.0931      | 6.11439      | 1.00323      | 0.0592  |

**Figure S2.** HPLC purity of **17** (95%,  $R_t$  = 14.52 min) as an antiallodynic agent.

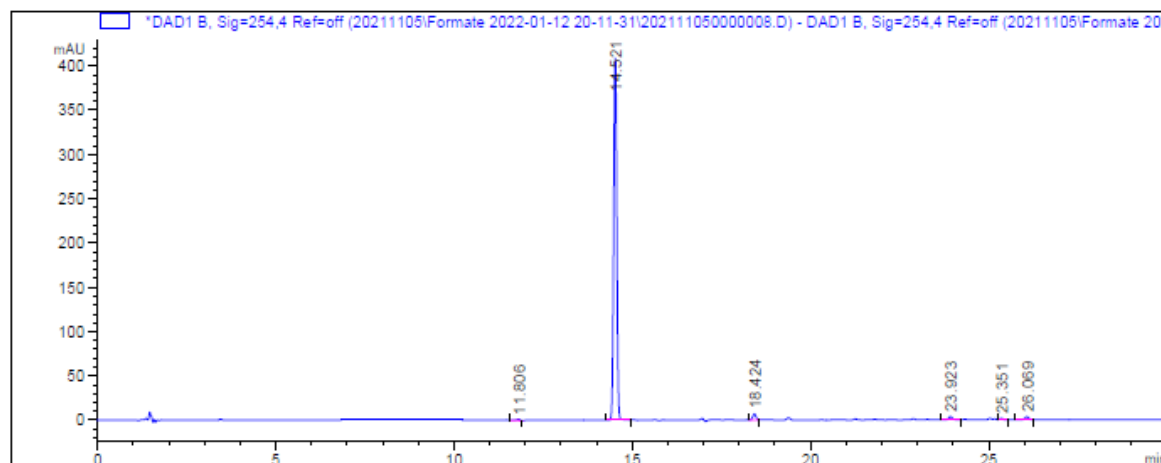

=====  
Area Percent Report  
=====

Sorted By : Signal  
Multiplier : 1.0000  
Dilution : 1.0000  
Do not use Multiplier & Dilution Factor with ISTDs

Signal 1: DAD1 B, Sig=254,4 Ref=off  
Signal has been modified after loading from rawdata file!

| Peak # | RetTime [min] | Type | Width [min] | Area [mAU*s] | Height [mAU] | Area %  |
|--------|---------------|------|-------------|--------------|--------------|---------|
| 1      | 11.806        | BB   | 0.1292      | 13.59158     | 1.56694      | 0.5495  |
| 2      | 14.521        | BB   | 0.0890      | 2351.59839   | 409.33325    | 95.0737 |
| 3      | 18.424        | BB   | 0.0928      | 40.11567     | 6.79968      | 1.6219  |
| 4      | 23.923        | BB   | 0.1168      | 29.75666     | 3.74103      | 1.2030  |
| 5      | 25.351        | VB   | 0.1061      | 12.27415     | 1.78730      | 0.4962  |
| 6      | 26.069        | BB   | 0.1141      | 26.11046     | 3.53890      | 1.0556  |
